# Supplementary material for: Estrogen Receptor β Isoforms Regulate Chemotherapy Resistance and the Cancer Stem Cell Population in Prostate Cancer Cells
Source: MDPI journal article supplement (doi:10.3390/receptors2030012), 2023-08-01
Supplement: s1 [file s1]

Supplementary materials

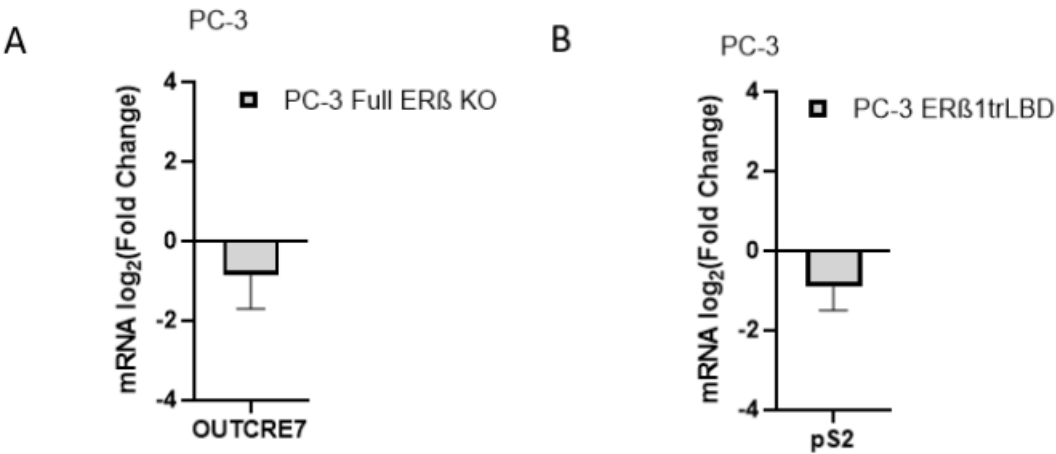

Figure S1. RT-qPCR verification of CRISPR/Cas9.

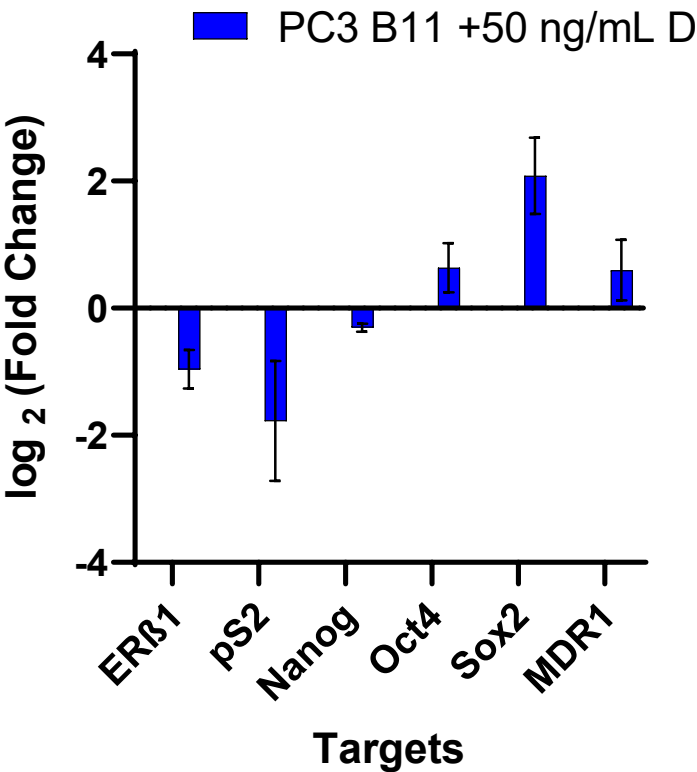

**Figure S2. Using doxycycline inducible shRNA specific for ERβ1.** Regulation of the estrogen receptor regulated gene PS2 and Nanog, Oct4, SOX2 and MDR-1 by doxycycline for 48 hours compared to levels without doxycycline (D).

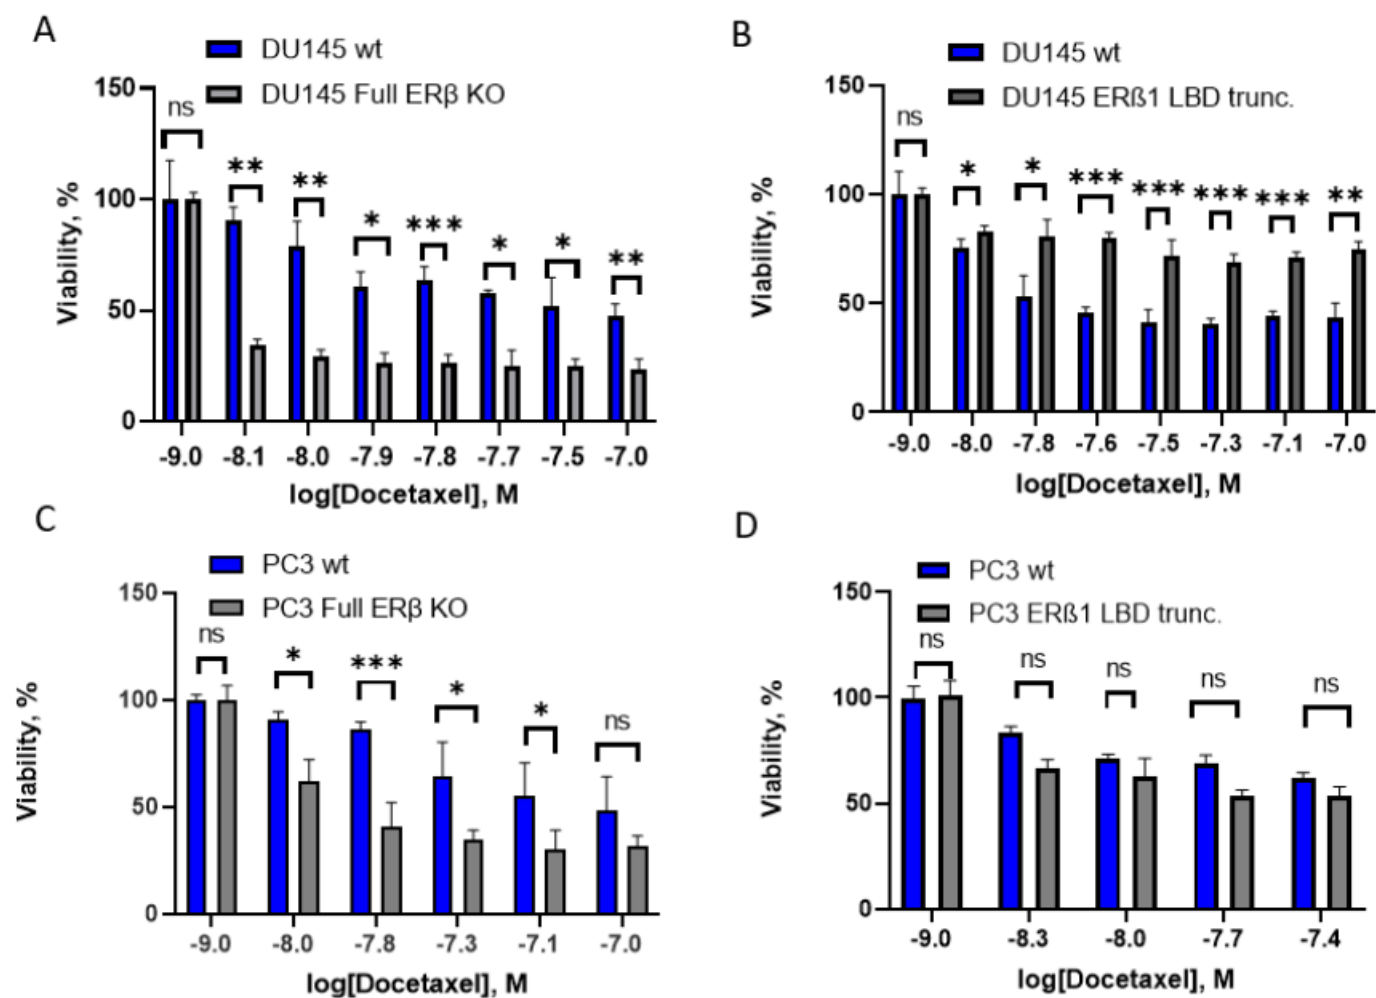

**Figure S3. Student t-test of MTS assays.** Viability of cells treated with increasing concentrations of the chemotherapeutic Docetaxel, expressed as % compared to untreated cells. A. DU145 comparison of ERβ full KO to WT. B. DU145 comparison of WT to ERβ LBD trunc. C. PC3 comparison of WT with ERβ full KO PC3 comparison of WT to ERβ1 LBD trunc. in response to Docetaxel.

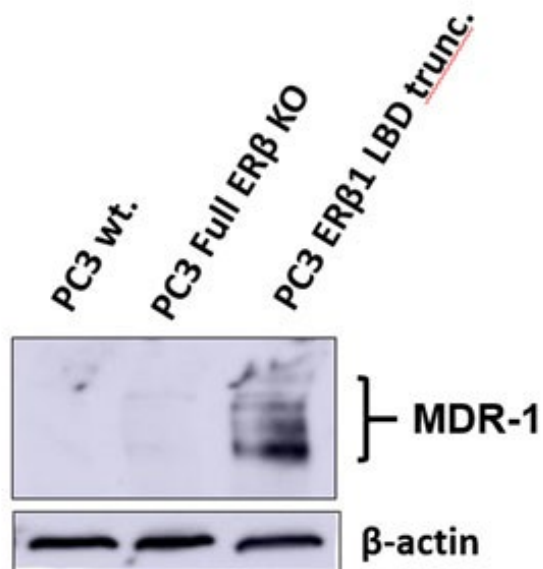

**Figure S4. Western blot of MDR-1.** MDR-1 expression in PC3 wt, PC3 Full ER $\beta$  KO and PC3 ER $\beta$ 1 LBD trunc.

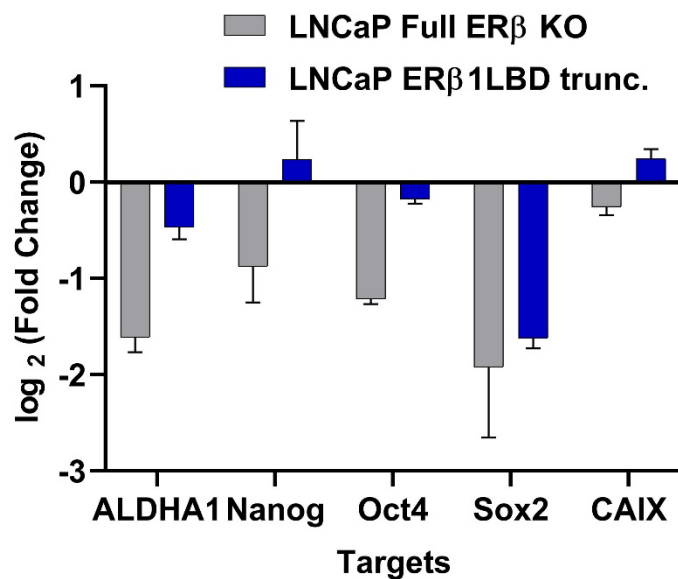

**Figure S5. Stem cell factor expression in LNCaP cells manipulated with Cas9/CRISPR.**
